# Supplementary material
Source: PubMed Central journal article supplement (PMC1315409)

046532\_Supplementary figure 2\_Šulić

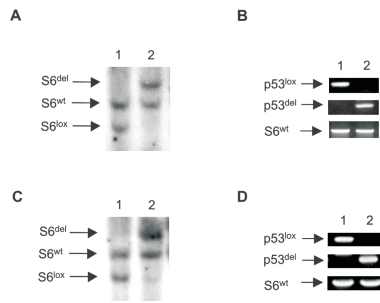

Supplement: genesdev_19_24_3070__2.pdf [file genesdev_19_24_3070__2.pdf]
